# Supplementary material
Source: MDPI journal article supplement (https://www.mdpi.com/2076-3417/9/17/3533)
Supplement: s1 [file s1]

**Table S1.** General characteristic of studied bedrooms as well as the distribution of nightly average indoor temperature and humidity in each studied bedroom depending on door opening.

| Parameters              | Teenager     |              | Child        |              |
|-------------------------|--------------|--------------|--------------|--------------|
|                         | doors opened | doors closed | doors opened | doors closed |
| Children's age, years   | 13           |              | 9            |              |
| Area, m <sup>2</sup>    | 12.45        |              | 11.30        |              |
| Window directed to      | south        |              | north        |              |
| Number of measurements  | 12723        | 9243         | 14999        | 15580        |
| Average temperature, °C | 21.1         | 21.1         | 22.1         | 22.0         |
| Minimum temperature, °C | 20.2         | 20.4         | 21.4         | 21.5         |
| Maximum temperature, °C | 22.2         | 22.2         | 22.6         | 22.5         |
| Average humidity, %     | 46.0         | 46.9         | 31.8         | 34.9         |
| Minimum humidity, %     | 43.6         | 42.9         | 29.7         | 32.6         |
| Maximum humidity, %     | 49.2         | 50.4         | 34.5         | 36.5         |
